# Supplementary material for: Late onset depression: dopaminergic deficit and clinical features of prodromal Parkinson’s disease: a cross-sectional study
Source: PubMed Central journal article supplement (PMC7841491; doi:10.1136/jnnp-2020-324266), 2020-12-02
Supplement: jnnp-2020-324266supp001.pdf [file jnnp-2020-324266supp001.pdf]

**Table e-1 Mean scores clinical measures when excluding patients with late onset depressive disorder (LOD) and healthy controls (HC) on medications potentially affecting these scores\***

| Clinical assessment               | LOD          | HC          | P    |
|-----------------------------------|--------------|-------------|------|
|                                   | <b>n=33</b>  | <b>n=24</b> |      |
| UPDRS Motor Examination mean (SD) | 0.7 (1.5)    | 1.9 (2.5)   | .004 |
|                                   | <b>n= 19</b> | <b>n=30</b> |      |
| RBD1Q "yes" n (%)                 | 5 (13.8)     | 2 (6.6)     | .08  |
| RBDSQ mean (SD)                   | 4.1 (3.1)    | 2.1 (2.1)   | .02  |
|                                   | <b>n=26</b>  | <b>n=24</b> |      |
| SCOPA-AUT mean (SD)               | 14.3 (7.7)   | 7.6 (5.1)   | .001 |

Mann Whitney U test, Fisher's Exact test

Abbreviations UPDRS= Unified Parkinson's Disease Rating scale, RBD1Q= REM Sleep Behavior Disorder Single-Question Screen, RBDSQ= The REM sleep Behaviour Disorder screening questionnaire, SCOPA-AUT= Scales for Outcomes in Parkinson's disease- Autonomic.

\*Potentially affecting RBDSQ, RBD1Q; Citalopram, Sertraline, Escitalopram, Venlafaxine, Fluoxetine, Nortriptyline, Amitriptyline, Paroxetine, Olanzapine and Risperidone, SCOPA AUT: Nortriptyline, Risperidone, Olanzapine, Pregabalin, Lisinopril, Atenolol, Losartan, Amlodipine, Ramipril, Bisoprolol and Bendroflumethiazide, MDS-UPDRS motor examination: Olanzapine, Risperidone and Amlodipine.

**Table e-2 Baseline characteristics of patients with late onset depressive disorder (LOD) and healthy controls (HC) who had a <sup>123</sup>I-ioflupane SPECT**

|                                      | LOD (n=29)  | HC (n=25)   | p    |
|--------------------------------------|-------------|-------------|------|
| Age in years mean (SD)               | 67.7 (7.5)  | 69.7 (9.0)  | .37  |
| Male/ Female n (%)                   | 13 (45)     | 9 (36)      | .35  |
| Caucasian n (%)                      | 25 (86.2)   | 24 (96)     | .23  |
| Family history of PD/ dementia n (%) | 9 (31)      | 6 (24)      | .40  |
| <12 years education n (%)            | 8 (27.6)    | 5 (20)      | .37  |
| Q risk score ^ mean (SD)             | 18.8 (11.6) | 19.2 (12.1) | .96  |
| Anti-hypertensive treatment n (%)    | 10 (34.5)   | 4 (16.4)    | .11  |
| Diabetes n (%)                       | 5 (17)      | 3 (12)      | .44  |
| Current/ Previous smoker n (%)       | 15 (51.7)   | 10 (40)     | .28* |

Independent samples t test, Mann Whitney U test and Fisher's exact

^Q risk score=Cardiovascular risk test calculator (<https://qrisk.org/2017/>, 2017), using the age, sex, ethnicity, smoking status, diabetes status and evidence of; chronic kidney disease, atrial fibrillation, blood pressure treatment and Rheumatoid arthritis, 2 HC did not complete the q risk

\*Current and ex-smoker vs Non smoker

Abbreviations; PD =Parkinson's disease

**Table e-3 Comparison of MRI findings between patients with late onset depressive disorder (LOD) and healthy controls (HC)**

| Region                           | LOD                                                  | HC                | <i>p</i> |
|----------------------------------|------------------------------------------------------|-------------------|----------|
|                                  | <b>Mean mm<sup>3</sup> (SD)</b>                      |                   |          |
|                                  | <b>Median [1<sup>st</sup> IQ; 3<sup>rd</sup> IQ]</b> |                   |          |
| <b>Third Ventricle</b>           | 3.11 (0.15)                                          | 3.15 (0.12)       | .20      |
|                                  | 3.11 [3.01;3.22]                                     | 3.18 [3.04; 3.25] |          |
| <b>Fourth Ventricle</b>          | 3.27 (0.11)                                          | 3.27 (0.10)       | .48      |
|                                  | 3.27 [2.20;3.33]                                     | 3.26 [3.19;3.36]  |          |
| <b>Right Caudate</b>             | 3.49 (0.05)                                          | 3.49 (0.05)       | .47      |
|                                  | 3.48 [3.46;3.53]                                     | 3.48 [3.43;3.51]  |          |
| <b>Left Caudate</b>              | 3.46 (0.05)                                          | 3.47 (0.05)       | .89      |
|                                  | 3.45 [3.41;3.49]                                     | 3.46 [3.43;3.51]  |          |
| <b>Right Putamen</b>             | 3.59 (0.04)                                          | 3.59 (0.02)       | .19      |
|                                  | 3.59 [3.55;3.63]                                     | 3.59 [3.57;3.62]  |          |
| <b>Left Putamen</b>              | 3.60 (0.05)                                          | 3.60 (0.03)       | .26      |
|                                  | 3.60 [3.56;3.63]                                     | 3.60 [3.58;3.63]  |          |
| <b>Right Hippocampus</b>         | 3.55 (0.04)                                          | 3.58 (0.03)       | .08      |
|                                  | 3.56 [3.52;3.58]                                     | 3.57 [3.54;3.61]  |          |
| <b>Left Hippocampus</b>          | 3.54 (0.05)                                          | 3.55 (0.03)       | .45      |
|                                  | 3.54 [3.50;3.59]                                     | 3.55 [3.53;3.59]  |          |
| <b>Right Amygdala</b>            | 3.18 (0.05)                                          | 3.21 (0.03)       | .07      |
|                                  | 3.20 [3.16;3.21]                                     | 3.21 [3.2;3.24]   |          |
| <b>Left Amygdala</b>             | 3.19 (0.05)                                          | 3.21 (0.03)       | .24      |
|                                  | 3.19 [3.17;3.24]                                     | 3.21 [3.18;3.24]  |          |
| <b>Total white matter</b>        | 5.61 (0.05)                                          | 5.61 (0.05)       | .30      |
|                                  | 5.61 [5.58;5.65]                                     | 5.61 [5.57;5.65]  |          |
| <b>Total grey matter</b>         | 5.64 (0.03)                                          | 5.65 (0.03)       | .83      |
|                                  | 5.64 [5.62;5.67]                                     | 5.65 [5.63;5.67]  |          |
| <b>Total white matter lesion</b> | 3.04 (0.60)                                          | 3.16 (0.63)       | .96      |
|                                  | 3.04 [2.54;3.43]                                     | 3.25 [2.62;3.56]  |          |

Analysis of variance (ANCOVA) with total intracranial volume (TIV), type of scanner, age and gender as a covariate.

Abbreviations: mm<sup>3</sup>=millimeters cube, SD= standard deviation.

**Figure e-1 Patients with LOD (n=36) and healthy controls (HC) (n=30) that had abnormal scores on the clinical scales when using cut-offs**

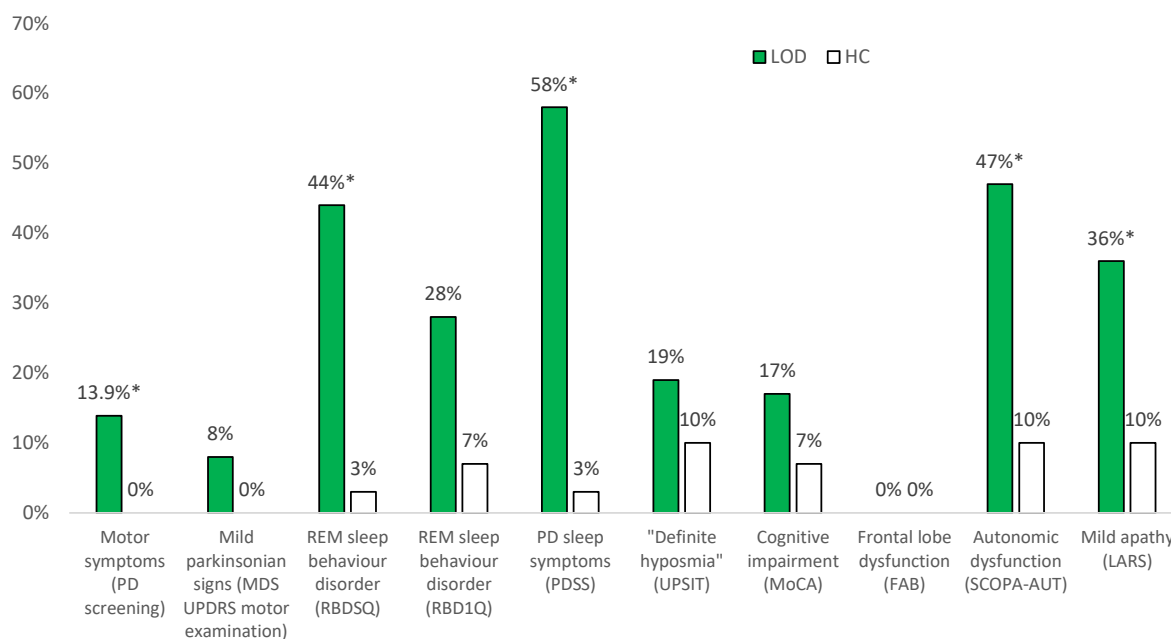

\* $p < 0.05$  using a Fisher's Exact between participant groups

LOD= late onset depressive disorder, PD screening= Parkinson's disease screening questionnaire, MPS= Mild Parkinsonian signs, RBD1Q= REM Sleep Behavior Disorder Single-Question Screen, RBDSQ= The REM sleep Behaviour Disorder screening questionnaire, PDSS=Parkinson's disease sleep scale, UPSIT= University of Pennsylvania Smell Identification Test, MoCA= Montreal Cognitive Assessment, FAB=Frontal Assessment Battery, SCOPA-AUT= Scales for Outcomes in Parkinson's disease- Autonomic, , LARS= Lille Apathy Rating Scale

*References for the clinical assessments and cut offs used:*

Kroenke K, Spitzer RL, Williams JB. The PHQ-9: validity of a brief depression severity measure. *J Gen Intern Med.* 2001;16(9):606-613.

Zigmond AS, Snaith RP. The hospital anxiety and depression scale. *Acta psychiatrica Scandinavica.* 1983;67(6):361-370.

Goetz CG, Tilley BC, Shaftman SR, et al. Movement Disorder Society-sponsored revision of the Unified Parkinson's Disease Rating Scale (MDS-UPDRS): scale presentation and clinimetric testing results. *Movement disorders: official journal of the Movement Disorder Society.* 2008;23(15):2129-2170.

Nasreddine ZS, Phillips NA, Bedirian V, et al. The Montreal Cognitive Assessment, MoCA: a brief screening tool for mild cognitive impairment. *Journal of the American Geriatrics Society.* 2005;53(4):695-699.

Dubois B, Slachevsky A, Litvan I, Pillon B. The FAB: a Frontal Assessment Battery at bedside. *Neurology.* 2000;55(11):1621-1626.

Sockeel P, Dujardin K, Devos D, Deneve C, Destee A, Defebvre L. The Lille apathy rating scale (LARS), a new instrument for detecting and quantifying apathy: validation in Parkinson's disease. *Journal of neurology, neurosurgery, and psychiatry.* 2006;77(5):579-584.

Postuma RB, Arnulf I, Hogl B, et al. A single-question screen for rapid eye movement sleep behavior disorder: a multicenter validation study. *Movement disorders: official journal of the Movement Disorder Society.* 2012;27(7):913-916.

Stiasny-Kolster K, Mayer G, Schafer S, Moller JC, Heinzel-Gutenbrunner M, Oertel WH. The REM sleep behavior disorder screening questionnaire--a new diagnostic instrument. *Movement disorders: official journal of the Movement Disorder Society.* 2007;22(16):2386-2393.

Chaudhuri KR, Pal S, DiMarco A, et al. The Parkinson's disease sleep scale: a new instrument for assessing sleep and nocturnal disability in Parkinson's disease. *Journal of neurology, neurosurgery, and psychiatry.* 2002;73(6):629-635.

Kim JH, Cheong HK, Lee CS, Yi SE, Park KW. The validity and reliability of a screening questionnaire for Parkinson's disease in a community. *Journal of preventive medicine and public health = Yebang Uihakhoe chi.* 2010;43(1):9-17.

Visser M, Marinus J, Stiggelbout AM, Van Hilten JJ. Assessment of autonomic dysfunction in Parkinson's disease: the SCOPA-AUT. *Movement disorders: official journal of the Movement Disorder Society.* 2004;19(11):1306-1312.

Doty RL, Shaman P, Kimmelman CP, Dann MS. University of Pennsylvania Smell Identification Test: a rapid quantitative olfactory function test for the clinic. *The Laryngoscope.* 1984;94(2 Pt 1):176-178.

*For calculating the MPS, MoCA, hyposmia and axial symptoms, bradykinesia, rigidity and tremor cut offs;*

Noyce AJ, Schrag A, Masters JM, Bestwick JP, Giovannoni G, Lees AJ. Subtle motor disturbances in PREDICT-PD participants. *J Neurol Neurosurg Psychiatry.* 2017;88(3):212-217.

Luis CA, Keegan AP, Mullan M. Cross validation of the Montreal Cognitive Assessment in community dwelling older adults residing in the Southeastern US. *International journal of geriatric psychiatry.* 2009;24(2):197-201.

Noyce AJ, Bestwick JP, Silveira-Moriyama L, et al. PREDICT-PD: identifying risk of Parkinson's disease in the community: methods and baseline results. *J Neurol Neurosurg Psychiatry.* 2014;85(1):31-37.

Li X, Xing Y, Martin-Bastida A, Piccini P, Auer DP. Patterns of grey matter loss associated with motor subscores in early Parkinson's disease. *NeuroImage Clinical*. 2018;17:498-504.
